# Supplementary material
Source: PubMed Central journal article supplement (PMC3317558)
Supplement: cr2011197x2.pdf [file cr2011197x2.pdf]

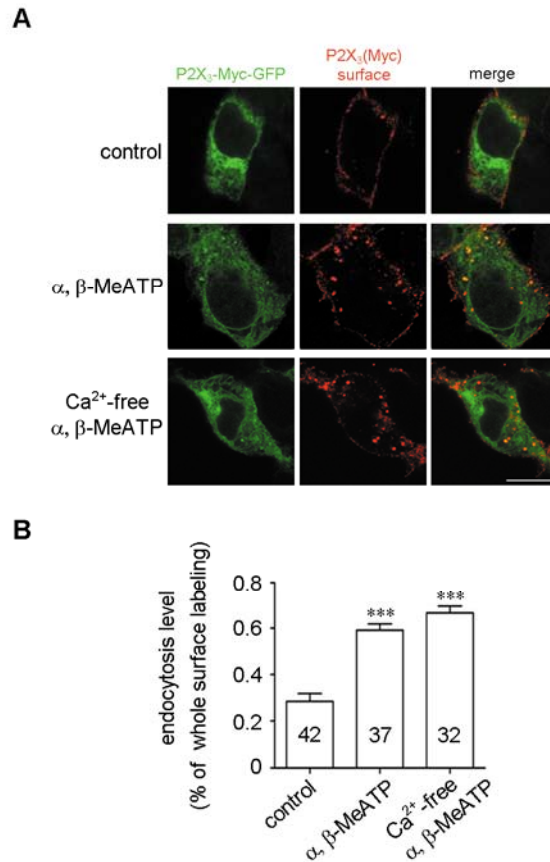

**Supplementary information, Figure S2** Depletion of extracellular  $\text{Ca}^{2+}$  had no effect on the ATP-dependent endocytosis of  $\text{P2X}_3$  receptor.

**(A)** HEK293 cells expressing  $\text{P2X}_3$ -Myc-GFP were treated with  $\alpha, \beta$ -MeATP in the presence or absence of extracellular  $\text{Ca}^{2+}$ . A Myc antibody (red) was used to label the  $\text{P2X}_3$  receptors on the surface followed by  $\alpha, \beta$ -MeATP-induced endocytosis. Representative images showed that extracellular calcium had no effect on  $\alpha, \beta$ -MeATP-induced  $\text{P2X}_3$  receptor endocytosis.

**(B)** The endocytic signals were quantitated and a significance analysis was performed. \*\*\*,  $P < 0.001$  versus control,  $n = 3$ . The number on bars represents the number of cells per condition.
