# Supplementary material
Source: PubMed Central journal article supplement (PMC3317558)
Supplement: cr2011197x3.pdf [file cr2011197x3.pdf]

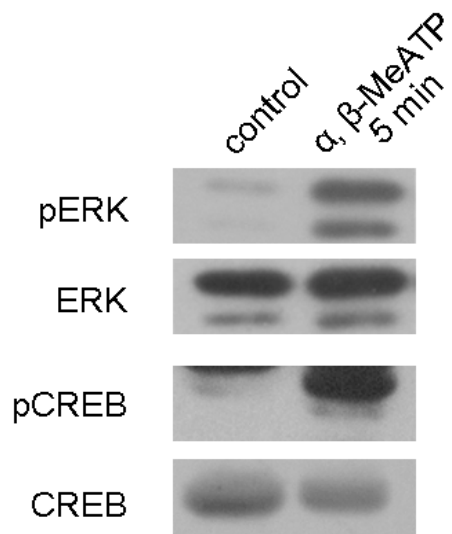

**Supplementary information, Figure S3**  $\alpha, \beta$ -MeATP treatment applied directly to the cell body of cultured DRG neurons activated ERK and CREB within 5 min. Total ERK and CREB served as loading controls.
