# Supplementary material
Source: PubMed Central journal article supplement (PMC3317558)
Supplement: cr2011197x4.pdf [file cr2011197x4.pdf]

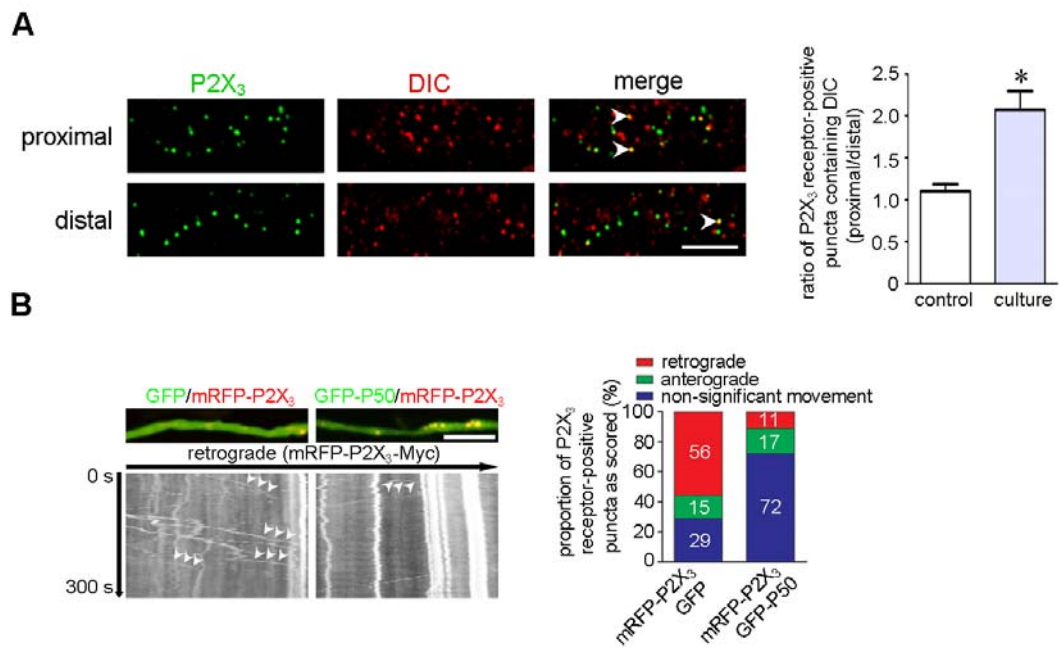

**Supplementary information, Figure S4** Dynein complex mediated the retrograde transport of P2X<sub>3</sub> receptors.

(A) As in Figure 6B, representative images showed that DIC co-localized with P2X<sub>3</sub> receptor at both the proximal and the distal 0.5 cm sciatic nerve segments cultured for 10 h at 37° C. The retrograde-transported ratio calculated from the percentages of P2X<sub>3</sub> receptor-positive puncta containing DIC in the proximal versus distal segments showed a significant increase in cultured nerves compared with that in the freshly collected nerves. \*,  $P < 0.05$  versus control ( $n = 3$ , unpaired  $t$ -test). Scale bar, 10  $\mu$ m. (B) Cultured DRG neurons were co-transfected with either mRFP-P2X<sub>3</sub>-Myc/GFP or mRFP-P2X<sub>3</sub>-Myc/GFP-P50. Axonal movement of these signals was captured by live imaging and representative images were shown. Kymographs derived from these time-lapse image series showed that over-expression of GFP-P50 induced most mRFP-P2X<sub>3</sub>-Myc-positive puncta showing non-significant movement. The data regarding the percentages of retrograde, anterograde and non-significant movement were quantitated and shown. Scale bar, 5  $\mu$ m.
