# Supplementary material
Source: PubMed Central journal article supplement (PMC3317558)
Supplement: cr2011197x5.pdf [file cr2011197x5.pdf]

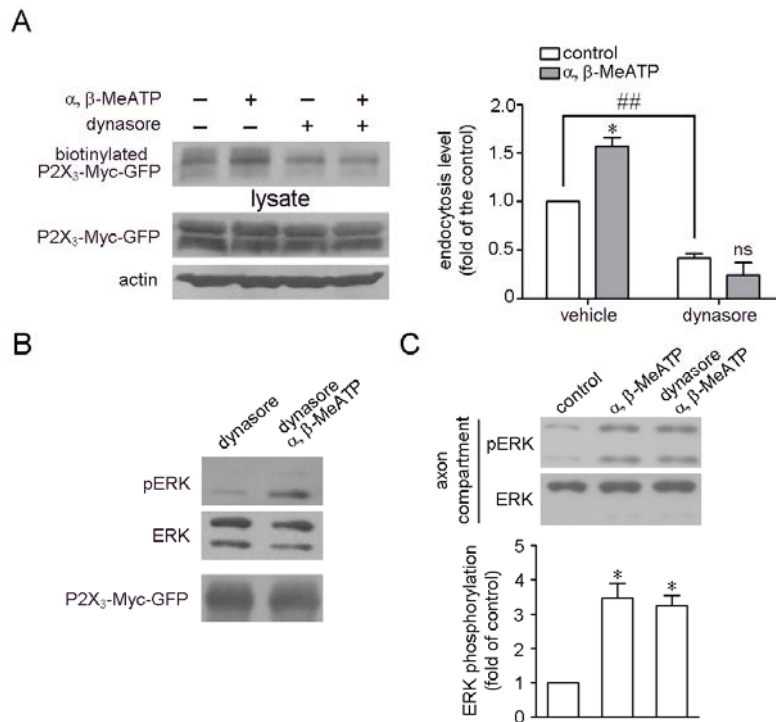

**Supplementary information, Figure S5**  $\alpha, \beta$ -MeATP-induced endocytosis of P2X<sub>3</sub>-Myc-GFP rather than  $\alpha, \beta$ -MeATP-induced ERK activation *via* P2X<sub>3</sub> receptor is dependent on dynamin.

(A) Dynasore pre-treatment abolished  $\alpha, \beta$ -MeATP-induced endocytosis of P2X<sub>3</sub>-Myc-GFP in HEK293 cells. \*,  $P < 0.05$  versus control, ##,  $P < 0.01$  versus indicated treatment,  $n = 3$ . (B)  $\alpha, \beta$ -MeATP-induced ERK phosphorylation *via* P2X<sub>3</sub> receptor was not affected by dynasore in HEK293 cells. (C) Local ERK activation by  $\alpha, \beta$ -MeATP application to the axon terminal in microfluidic chamber was not affected by dynasore pre-treatment in the same compartment. \*,  $P < 0.05$  versus vehicle treatment,  $n = 3$ .
