# Supplementary material
Source: PubMed Central journal article supplement (PMC3317558)
Supplement: cr2011197x14.pdf [file cr2011197x14.pdf]

**Supplementary information, Table S1** Antibody company and working concentration

| antibody name    | company                      | concentration<br>for Western<br>blotting | concentration for<br>immunohistochemistry or<br>immunocytochemistry |
|------------------|------------------------------|------------------------------------------|---------------------------------------------------------------------|
| P2X <sub>3</sub> | Neuromics                    | 1:1000                                   |                                                                     |
| P2X <sub>3</sub> | Chemicon                     |                                          | 1:2000                                                              |
| TrkA             | Advenced<br>Targeting System | 1:5000                                   |                                                                     |
| TrkA             | R&D                          |                                          | 1:1000                                                              |
| NGF              | Santa Cruz                   | 1:500                                    |                                                                     |
| NGF              | R&D                          |                                          | 1:400                                                               |
| synaptophysin    | Chemicon                     | 1:2000                                   | 1:1500                                                              |
| actin            | Chemicon                     | 1:100000                                 |                                                                     |
| Myc              | Sigma                        |                                          | 1:50                                                                |
| GFP              | Roche                        | 1:2000                                   |                                                                     |
| tubulin          | Sigma                        | 1:1000                                   |                                                                     |
| pERK             | Santa Cruz                   | 1:1000                                   |                                                                     |
| ERK              | Santa Cruz                   | 1:2000                                   |                                                                     |
| H-Ras            | Santa Cruz                   | 1:2000                                   |                                                                     |
| pERK             | Cell Signaling               |                                          | 1:100                                                               |
| Ras              | Santa Cruz                   |                                          | 1:250                                                               |
| pMEK             | Cell signaling               | 1:1000                                   | 1:250                                                               |
| Rab7             | Sigma                        | 1:1000                                   |                                                                     |
| caveolin1a       | Santa Cruz                   | 1:5000                                   | 1:500                                                               |
| pCREB            | Cell Signaling               | 1:1000                                   |                                                                     |
| CREB             | Cell Signaling               | 1:1000                                   |                                                                     |
| DIC              | Chemicon                     |                                          | 1:100                                                               |
